# Supplementary material for: Deep maxima of phytoplankton biomass, primary production and bacterialproduction in the Mediterranean Sea during late spring
Source: Copernicus journal article supplement (doi:10.5194/bg-2020-261), 2020-07-20
Supplement: Supplementary file 1 [file bg-2020-261-supplement.pdf]

2 **Deep maxima of phytoplankton biomass, primary production and bacterial**  
**production in the Mediterranean Sea during late spring**

4 Emilio Marañón, France Van Wambeke, Julia Uitz, Emmanuel S. Boss, María Pérez-Lorenzo, Julie  
Dinasquet, Nils Haëntjens, Céline Dimier

6 Correspondence to: E. Marañón ([em@uvigo.es](mailto:em@uvigo.es))

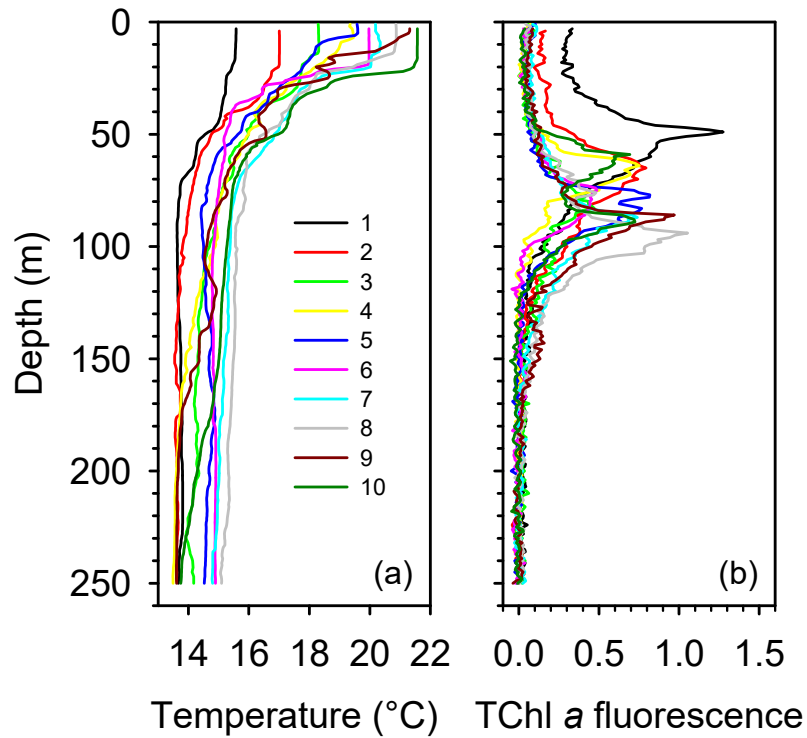

8

10 **Figure S1.** Vertical profiles of temperature and total chlorophyll *a* fluorescence (0-250 m) at short stations.

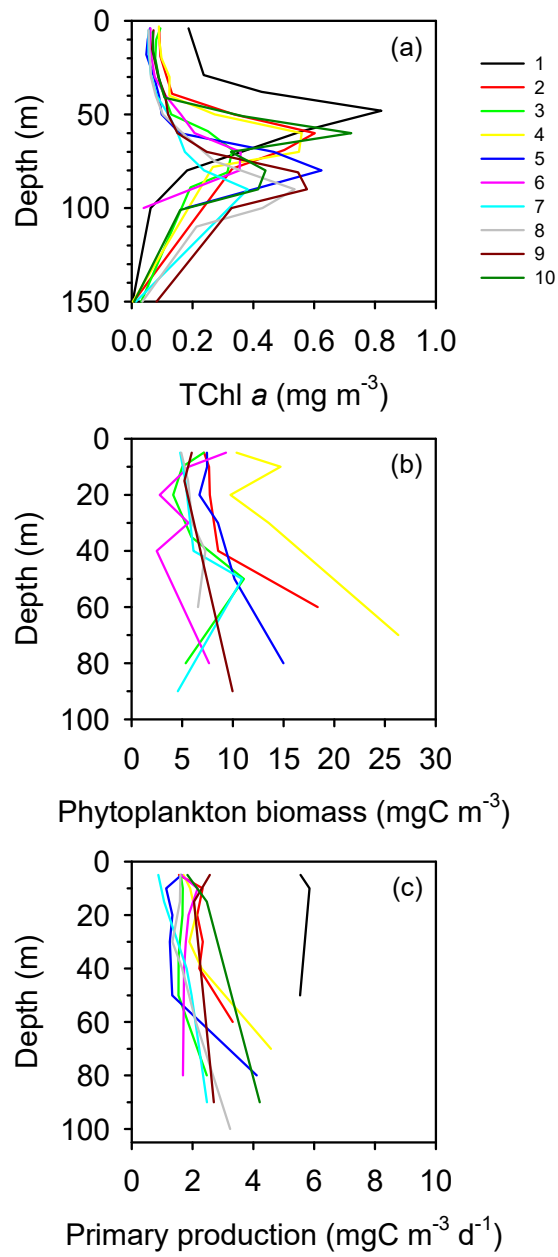

12

14 **Figure S2.** Vertical profiles of a) total chlorophyll *a* concentration, b) phytoplankton biomass concentration and c)  
 15 primary production at short stations.

16

18

20

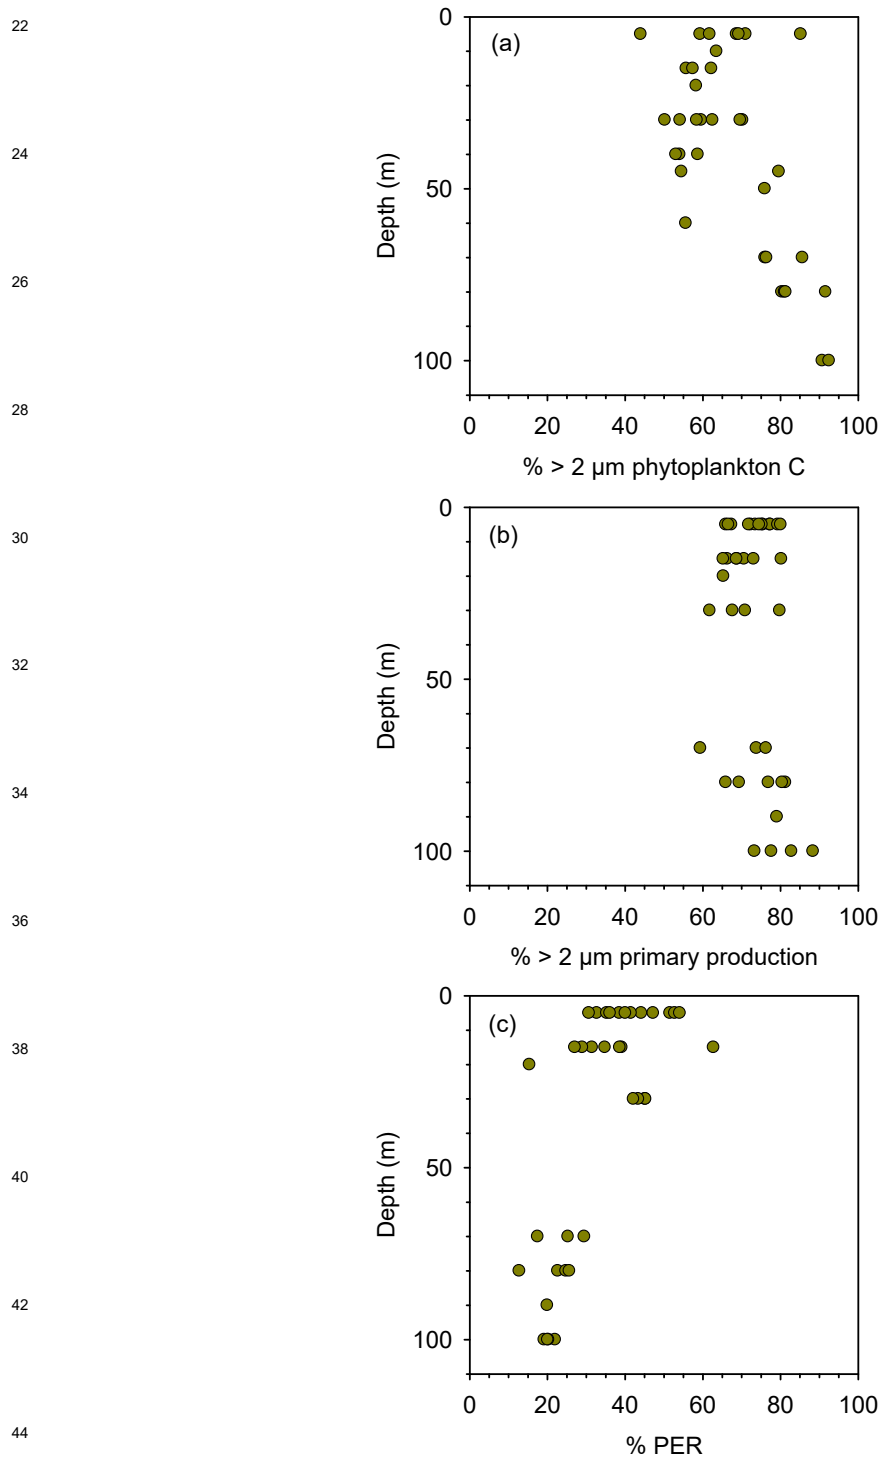

46 **Figure S3.** Vertical distribution of a) the contribution of phytoplankton larger than 2 μm in diameter to total  
 48 phytoplankton carbon biomass, b) the contribution of > 2 μm phytoplankton to total primary production and c) the  
 percentage of extracellular release at the long stations.

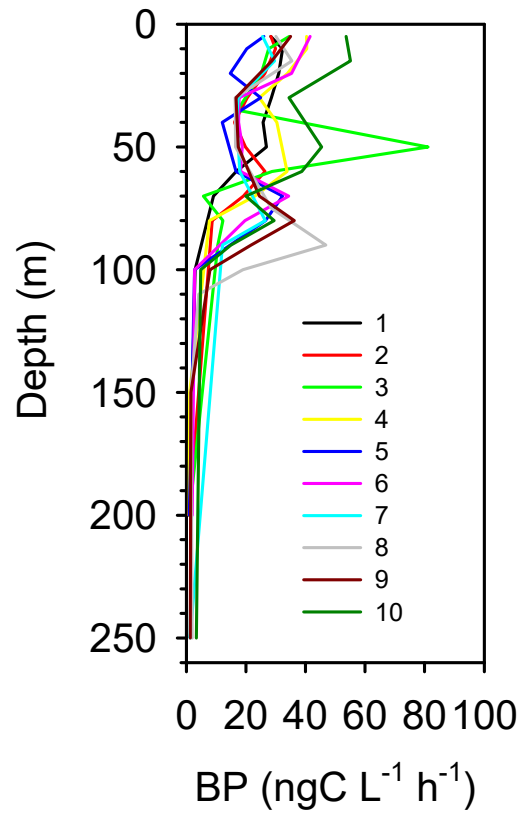

50

**Figure S4.** Vertical profiles of heterotrophic prokaryotic production (BP) at short stations.

52

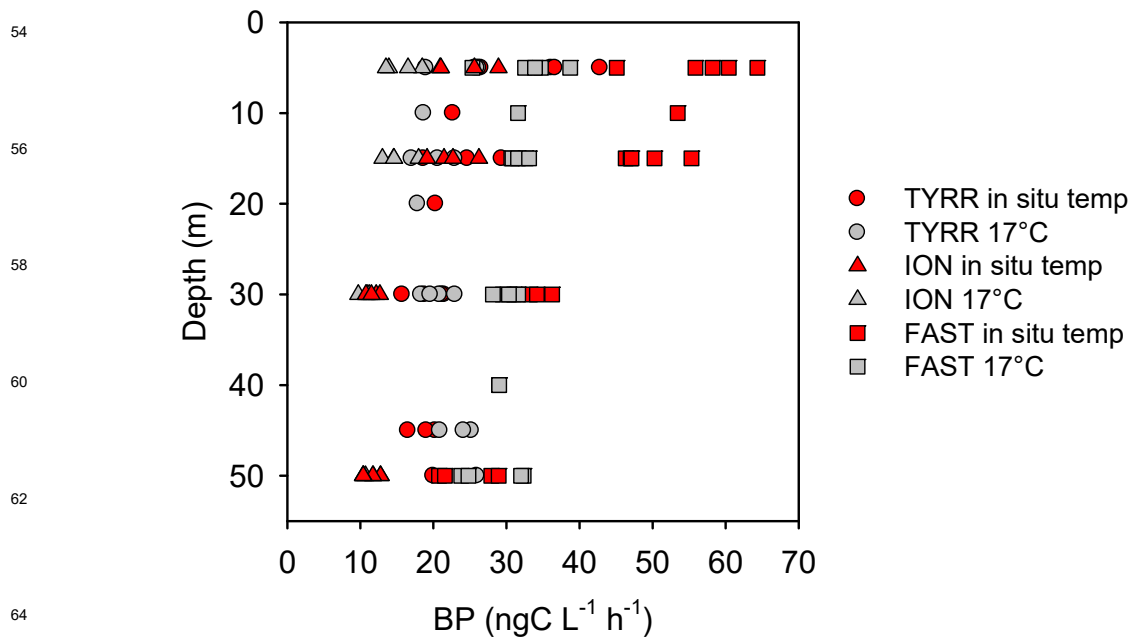

66 **Fig. S5.** Vertical distribution of bacterial production at in situ temperature and at a constant temperature of 17°C in the  
 68 upper 50 m of stations TYRR, ION and FAST. Bacterial production at each temperature was calculated taking into  
 account the temperature dependence factors determined experimentally during the cruise (see Methods for details).

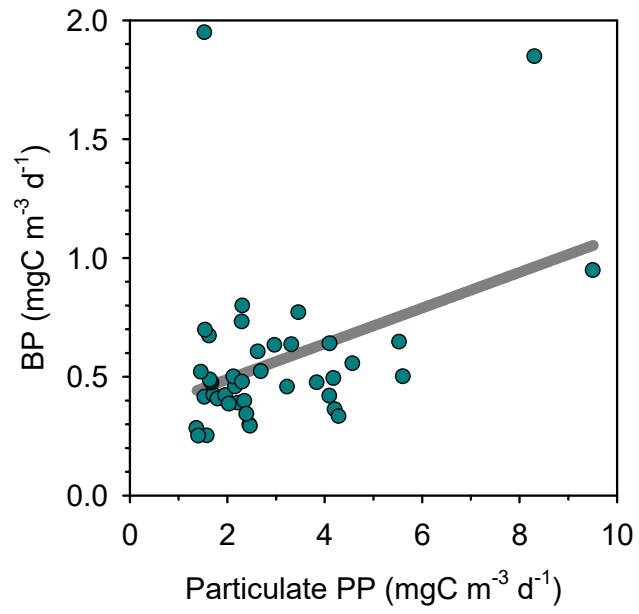

70

**Fig. S6.** Relationship between particulate primary production (PP) and heterotrophic prokaryotic production (BP) for samples taken from depths below 30 m in both short and long stations. The linear regression is  $y = 0.075x + 0.34$  ( $r^2 = 0.15$ ,  $n = 42$ ,  $p = 0.011$ ).

74
